# Supplementary material for: Identification and Characterization of Calonectria Species Associated with Plant Diseases in Southern China
Source: MDPI journal article supplement (doi:10.3390/jof8070719), 2022-07-09
Supplement: s1 [file s1]

**Supplementary Table S1.** GeneBank accession numbers of *Calonectria* strains used in phylogenetic analysis. The isolates obtained in this study are bold.

| Species                          | Culture collection number        | GenBank accession number |                 |                  |
|----------------------------------|----------------------------------|--------------------------|-----------------|------------------|
|                                  |                                  | <i>cmdA</i>              | <i>tef1-α</i>   | <i>β-tubulin</i> |
| <i>Ca. acaciicola</i>            | CMW 47173 <sup>T</sup>           | MT335160                 | MT412690        | MT412930         |
| <i>Ca. acaciicola</i>            | CMW 47174                        | MT335161                 | MT412691        | MT412931         |
| <i>Ca. acicola</i>               | CMW 30996 <sup>T</sup>           | MT335162                 | MT412692        | MT412932         |
| <i>Ca. acicola</i>               | CBS 114812                       | MT335163                 | MT412693        | MT412933         |
| <i>Ca. aciculata</i>             | CERC 5342 <sup>T</sup>           | MT335164                 | MT412694        | MT412934         |
| <i>Ca. aconidialis</i>           | CMW 35174 <sup>T</sup>           | MT335165                 | MT412695        | N/A              |
| <i>Ca. aconidialis</i>           | CMW 31370                        | MT335167                 | MT412697        | N/A              |
| <i>Ca. aconidialis</i>           | CMW 31390                        | MT335179                 | MT412709        | N/A              |
| <i>Ca. aconidialis</i>           | CMW 31392                        | MT335169                 | MT412699        | N/A              |
| <i>Ca. aconidialis</i>           | CMW 31439                        | MT335178                 | MT412708        | N/A              |
| <i>Ca. aconidialis</i>           | CMW 31440                        | MT335177                 | MT412707        | N/A              |
| <i>Ca. aconidialis</i>           | CMW 35169                        | MT335175                 | MT412705        | N/A              |
| <i>Ca. aconidialis</i>           | CMW 35184                        | MT335174                 | MT412704        | N/A              |
| <i>Ca. aconidialis</i>           | CMW 35187                        | MT335173                 | MT412703        | N/A              |
| <i>Ca. aconidialis</i>           | CMW 35409                        | MT335171                 | MT412701        | N/A              |
| <b><i>Ca. aconidialis</i></b>    | <b>ZHKUCC 210031</b>             | <b>ON375352</b>          | <b>ON375353</b> | <b>ON375354</b>  |
| <i>Ca. aeknauliensis</i>         | CMW 48253 <sup>T</sup>           | MT335180                 | MT412710        | N/A              |
| <i>Ca. aeknauliensis</i>         | CMW 48254                        | MT335181                 | MT412711        | N/A              |
| <i>Ca. asiatica</i>              | CBS 114073 <sup>T</sup>          | AY725741                 | AY725705        | AY725616         |
| <i>Ca. australiensis</i>         | CMW 23669 <sup>T</sup>           | MT335192                 | MT412723        | MT412946         |
| <i>Ca. brasiliensis</i>          | CBS 133609                       | KC491222                 | KC491225        | KC491228         |
| <i>Ca. brasiliensis</i>          | CBS 134818                       | KM395991                 | KM395817        | KM395905         |
| <i>Ca. brasiliensis</i>          | CBS 230.515 <sup>T</sup>         | MT335200                 | MT412731        | MT412953         |
| <i>Ca. brasiliensis</i>          | CMW 32949                        | MT335201                 | MT412732        | MT412954         |
| <i>Ca. brassicicola</i>          | CBS 112841 <sup>T</sup>          | KX784561                 | KX784689        | KX784619         |
| <i>Ca. bumicola</i>              | CMW 48257 <sup>T</sup>           | MT335205                 | MT412736        | N/A              |
| <i>Ca. canadiana</i>             | CMW 23673 <sup>T</sup>           | MT335206                 | MT412737        | MT412958         |
| <i>Ca. canadiana</i>             | CERC 8952                        | MT335290                 | MT412821        | MT413035         |
| <i>Ca. auriculiformis</i>        | CMW 47178 <sup>T</sup>           | MT335190                 | MT412721        | MT412944         |
| <i>Ca. auriculiformis</i>        | CMW 47179                        | MT335191                 | MT412722        | MT412945         |
| <b><i>Ca. auriculiformis</i></b> | <b>ZHKUCC 210053</b>             | <b>ON260793</b>          | <b>ON260797</b> | <b>ON260801</b>  |
| <b><i>Ca. auriculiformis</i></b> | <b>ZHKUCC 210054</b>             | <b>ON260794</b>          | <b>ON260798</b> | <b>ON260802</b>  |
| <b><i>Ca. cassiae</i></b>        | <b>ZHKUCC 210011<sup>T</sup></b> | <b>ON260790</b>          | <b>MZ516860</b> | <b>MZ516863</b>  |
| <b><i>Ca. cassiae</i></b>        | <b>ZHKUCC 210012</b>             | <b>ON260791</b>          | <b>MZ516861</b> | <b>MZ516864</b>  |
| <i>Ca. cerciana</i>              | CMW 25309 <sup>T</sup>           | MT335211                 | MT412742        | MT412963         |
| <i>Ca. cerciana</i>              | CMW 25290                        | MT335212                 | MT412743        | MT412964         |
| <i>Ca. chinensis</i>             | CMW 30986                        | MT335221                 | MT412752        | MT412973         |

Supplementary Table S1. (Continued)

| Species                          | Culture collection number         | GeneBank accession number |                 |                  |
|----------------------------------|-----------------------------------|---------------------------|-----------------|------------------|
|                                  |                                   | <i>cmdA</i>               | <i>tef1-α</i>   | <i>β-tubulin</i> |
| <i>Ca. chinensis</i>             | CMW 47192                         | MT335300                  | MT412831        | MT413045         |
| <i>Ca. cochinchinensis</i>       | CMW 47187                         | MT335227                  | MT412758        | MT412979         |
| <i>Ca. colhounii</i>             | CBS 293.79 <sup>T</sup>           | GQ267373                  | GQ267301        | DQ190564         |
| <i>Ca. colombiensis</i>          | CMW 23676 <sup>T</sup>            | MT335228                  | MT412759        | MT412980         |
| <i>Ca. colombiensis</i>          | CMW 30985                         | MT335229                  | MT412760        | MT412981         |
| <i>Ca. crousiana</i>             | CMW 27249 <sup>T</sup>            | MT335230                  | MT412761        | MT412982         |
| <i>Ca. crousiana</i>             | CMW 27253                         | MT335231                  | MT412762        | MT412983         |
| <i>Ca. curvispora</i>            | CMW 23693 <sup>T</sup>            | MT335232                  | MT412763        | N/A              |
| <i>Ca. curvispora</i>            | CMW 48245                         | MT335233                  | MT412764        | N/A              |
| <i>Ca. cylindrospora</i>         | CBS 119670                        | MT335236                  | MT412767        | MT412985         |
| <i>Ca. cylindrospora</i>         | CMW 30978                         | MT335237                  | MT412768        | MT412986         |
| <i>Ca. cylindrospora</i>         | CBS 136425                        | MT335235                  | MT412766        | MT412984         |
| <i>Ca. eucalypti</i>             | CMW 27209                         | MT335341                  | MT412872        | MT413084         |
| <b><i>Ca. eucalypti</i></b>      | <b>ZHKUCC 210013</b>              | <b>ON260792</b>           | <b>MZ516862</b> | <b>MZ516865</b>  |
| <i>Ca. fujianensis</i>           | CMW 27254                         | MT335250                  | MT412781        | MT412999         |
| <i>Ca. fujianensis</i>           | CMW 27257 <sup>T</sup>            | MT335249                  | MT412780        | MT412998         |
| <i>Ca. fujianensis</i>           | CBS 131802                        | MT335302                  | MT412833        | MT413047         |
| <i>Ca. gordoniae</i>             | CMW 23694 <sup>T</sup>            | MT335251                  | MT412782        | MT413000         |
| <b><i>Ca. guangdongensis</i></b> | <b>ZHKUCC 21-0062<sup>T</sup></b> | <b>MZ491127</b>           | <b>MZ491149</b> | <b>MZ491171</b>  |
| <b><i>Ca. guangdongensis</i></b> | <b>ZHKUCC 21-0063</b>             | <b>MZ491128</b>           | <b>MZ491150</b> | <b>MZ491172</b>  |
| <i>Ca. hawksworthii</i>          | CBS 111870 <sup>T</sup>           | MT335254                  | MT412785        | MT413003         |
| <i>Ca. hawksworthii</i>          | CMW 14878                         | MT335378                  | MT412909        | MT413119         |
| <i>Ca. hawksworthii</i>          | CMW 31393                         | MT335247                  | MT412778        | MT412996         |
| <i>Ca. heveicola</i>             | CMW 49913 <sup>T</sup>            | MT335255                  | MT412786        | MT413004         |
| <i>Ca. heveicola</i>             | CMW 49928                         | MT335280                  | MT412811        | MT413025         |
| <i>Ca. heveicola</i>             | CMW 49935                         | MT335281                  | MT412812        | MT413026         |
| <i>Ca. honghensis</i>            | CERC 5572 <sup>T</sup>            | MT335256                  | MT412787        | MT413005         |
| <i>Ca. honghensis</i>            | CERC 5571                         | MT335257                  | MT412788        | MT413006         |
| <i>Ca. hongkongensis</i>         | CBS 114828 <sup>T</sup>           | MT335258                  | MT412789        | MT413007         |
| <i>Ca. hongkongensis</i>         | CERC 7132                         | MT335261                  | MT412792        | MT413010         |
| <b><i>Ca. hongkongensis</i></b>  | <b>ZHKUCC 210016</b>              | <b>MZ463742</b>           | <b>MZ516838</b> | <b>MZ516851</b>  |
| <i>Ca. ilicicola</i>             | CMW30998 <sup>T</sup>             | MT335266                  | MT412797        | N/A              |
| <i>Ca. indonesiae</i>            | CMW23683 <sup>T</sup>             | MT335267                  | MT412798        | MT413015         |
| <i>Ca. indonesiae</i>            | CBS 112840                        | MT335268                  | MT412799        | MT413016         |
| <i>Ca. insularis</i>             | CMW 30991 <sup>T</sup>            | MT335269                  | MT412800        | MT413017         |
| <i>Ca. insularis</i>             | CMW 30992                         | MT335270                  | MT412801        | MT413018         |
| <i>Ca. kyotensis</i>             | CBS 114525 <sup>T</sup>           | MT335271                  | MT412802        | MT413019         |
| <i>Ca. kyotensis</i>             | CBS 114550                        | MT335246                  | MT412777        | MT412995         |

Supplementary Table S1. (Continued)

| Species                         | Culture collection number         | GeneBank accession number |                 |                  |
|---------------------------------|-----------------------------------|---------------------------|-----------------|------------------|
|                                 |                                   | <i>cmdA</i>               | <i>tef1-α</i>   | <i>β-tubulin</i> |
| <i>Ca. kyotensis</i>            | CBS 114692                        | MT335245                  | MT412776        | MT412994         |
| <i>Ca. kyotensis</i>            | CERC 7126                         | MT335356                  | MT412887        | MT413098         |
| <i>Ca. kyotensis</i>            | CMW 31411                         | MT335388                  | MT412919        | MT413126         |
| <i>Ca. lageniformis</i>         | CBS 111324 <sup>T</sup>           | KX784574                  | KX784702        | KX784632         |
| <i>Ca. lantauensis</i>          | CERC 3302 <sup>T</sup>            | MT335272                  | MT412803        | N/A              |
| <i>Ca. lantauensis</i>          | CERC 3301                         | MT335273                  | MT412804        | N/A              |
| <i>Ca. lateralis</i>            | CMW 31412 <sup>T</sup>            | MT335274                  | MT412805        | MT413020         |
| <i>Ca. lichi</i>                | CERC 8866 <sup>T</sup>            | MT335278                  | MT412809        | MT413023         |
| <i>Ca. lichi</i>                | CERC 8850                         | MT335279                  | MT412810        | MT413024         |
| <i>Ca. lombardiana</i>          | CMW 30602 <sup>T</sup>            | MT335395                  | MT412926        | MT413133         |
| <i>Ca. hawksworthii</i>         | CMW 14878                         | MT335378                  | MT412909        | MT413119         |
| <i>Ca. maranhensis</i>          | CBS 134811 <sup>T</sup>           | KM396035                  | KM395861        | KM395948         |
| <i>Ca. maranhensis</i>          | CBS 134812                        | KM396036                  | KM395862        | KM395949         |
| <b><i>Ca. melaleuca</i></b>     | <b>ZHKUCC 21-0066<sup>T</sup></b> | <b>MZ491110</b>           | <b>MZ491132</b> | <b>MZ491154</b>  |
| <b><i>Ca. melaleuca</i></b>     | <b>ZHKUCC 21-0067</b>             | <b>MZ491111</b>           | <b>MZ491133</b> | <b>MZ491155</b>  |
| <i>Ca. monticola</i>            | CBS 140645 <sup>T</sup>           | KT964771                  | KT964773        | KT964769         |
| <i>Ca. monticola</i>            | CPC 28836                         | KT964772                  | KT964774        | KT964770         |
| <i>Ca. multiseptata</i>         | CMW 23692 <sup>T</sup>            | MT335299                  | MT412830        | MT413044         |
| <i>Ca. pacifica</i>             | CMW 16726 <sup>T</sup>            | MT335311                  | MT412842        | N/A              |
| <i>Ca. pacifica</i>             | CMW 30988                         | MT335312                  | MT412843        | N/A              |
| <i>Ca. paracolhounii</i>        | CBS 114679 <sup>T</sup>           | KX784582                  | KX784714        | KX784644         |
| <i>Ca. paracolhounii</i>        | CBS 114705                        | N/A                       | KX784715        | KX784645         |
| <i>Ca. penicilloides</i>        | CBS 174.55                        | MT335338                  | MT412869        | MT413081         |
| <i>Ca. plurilateralis</i>       | CBS 111401 <sup>T</sup>           | MT335340                  | MT412871        | MT413083         |
| <i>Ca. propaginicola</i>        | CBS 134815 <sup>T</sup>           | KM396040                  | KM395866        | KM395953         |
| <i>Ca. propaginicola</i>        | CBS 134816                        | KM396041                  | KM395867        | KM395954         |
| <i>Ca. propaginicola</i>        | CBS 134824                        | KM396049                  | KM395875        | KM395962         |
| <i>Ca. pseudoreteauidii</i>     | CMW 25310 <sup>T</sup>            | MT335354                  | MT412885        | MT413096         |
| <i>Ca. pseudoreteauidii</i>     | CMW 25292                         | MT335355                  | MT412886        | MT413097         |
| <i>Ca. pseudoreteauidii</i>     | CMW 31487                         | MT335348                  | MT412879        | MT413090         |
| <i>Ca. pseudoreteauidii</i>     | CBS 133349                        | MT335352                  | MT412883        | MT413094         |
| <i>Ca. queenslandica</i>        | CMW 30604 <sup>T</sup>            | MT335367                  | MT412898        | MT413108         |
| <i>Ca. queenslandica</i>        | CMW 30603                         | MT335368                  | MT412899        | MT413109         |
| <i>Ca. reteaudii</i>            | CMW 30984 <sup>T</sup>            | MT335370                  | MT412901        | MT413111         |
| <i>Ca. reteaudii</i>            | CMW 16738                         | MT335371                  | MT412902        | MT413112         |
| <b><i>Ca. shaoguanensis</i></b> | <b>ZHKUCC 210036<sup>T</sup></b>  | <b>MZ491112</b>           | <b>MZ491134</b> | <b>MZ491156</b>  |
| <b><i>Ca. shaoguanensis</i></b> | <b>ZHKUCC 210037</b>              | <b>MZ491113</b>           | <b>MZ491135</b> | <b>MZ491157</b>  |
| <b><i>Ca. strelitzensis</i></b> | <b>ZHKUCC 210019<sup>T</sup></b>  | <b>MZ491105</b>           | <b>MZ491129</b> | <b>MZ491151</b>  |
| <b><i>Ca. strelitzensis</i></b> | <b>ZHKUCC 210047</b>              | <b>MZ491106</b>           | <b>MZ491130</b> | <b>MZ491152</b>  |

Supplementary Table S1. (Continued)

| Species                         | Culture accession       | GeneBank accession number |                 |                  |
|---------------------------------|-------------------------|---------------------------|-----------------|------------------|
|                                 |                         | <i>cmdA</i>               | <i>tef1-α</i>   | <i>β-tubulin</i> |
| <b><i>Ca. strelitzensis</i></b> | <b>ZHKUCC 210048</b>    | <b>MZ491107</b>           | <b>MZ491131</b> | <b>MZ491153</b>  |
| <i>Ca. sumatrensis</i>          | CMW 23698 <sup>T</sup>  | MT335382                  | MT412913        | N/A              |
| <i>Ca. sumatrensis</i>          | CMW 30987               | MT335383                  | MT412914        | N/A              |
| <i>Ca. sumatrensis</i>          | CBS 112936              | MT335380                  | MT412911        | N/A              |
| <i>Ca. syzygiicola</i>          | CBS 112831 <sup>T</sup> | N/A                       | KX784736        | KX784663         |
| <i>Ca. tonkinensis</i>          | CMW 47430 <sup>T</sup>  | MT335384                  | MT412915        | MT413122         |
| <i>Ca. uniseptata</i>           | CBS 413.67 <sup>T</sup> | GQ267379                  | GQ267307        | GQ267208         |
| <i>Ca. variabilis</i>           | CMW 3187 <sup>T</sup>   | MT335392                  | MT412923        | MT413130         |
| <i>Ca. variabilis</i>           | CMW 2914                | MT335393                  | MT412924        | MT413131         |
| <i>Ca. yunnanensis</i>          | CERC 5339 <sup>T</sup>  | MT335396                  | MT412927        | MT413134         |
| <i>Ca. yunnanensis</i>          | CERC 5337               | MT335397                  | MT412928        | MT413135         |
| <i>Ca. yunnanensis</i>          | CERC 5376               | MT335361                  | MT412892        | MT413103         |
| <i>Curviciadiella cigna</i>     | CBS 109167 <sup>T</sup> | KM231287                  | KM231867        | KM232002         |
| <i>Curviciadiella cigna</i>     | CBS 109168              | KM231286                  | KM231868        | KM232003         |

T: ex-type isolates of the *Calonectria* species. Sequences produced in this study are in bold. CBS: Westerdijk Fungal Biodiversity Institute, Utrecht, The Netherlands; CERC: China Eucalypt Research Centre, Zhanjiang, Guangdong Province, China; CMW: Culture collection of the Forestry and Agricultural Biotechnology Institute (FABI), University of Pretoria, Pretoria, South Africa; ZHKUCC, Zhongkai University of Agriculture and Engineering Culture Collection. N/A: information is not available.
